# Supplementary material for: New water fractions and transit time distributions at Plynlimon, Wales, estimated from stable water isotopes in precipitation and streamflow
Source: Copernicus journal article supplement (doi:10.5194/hess-23-4367-2019), 2019-10-28
Supplement: Supplementary file 1 [file hess-23-4367-2019-supplement.zip]

Archive with 5 entries (5 files):
- Plynlimon_isotopes_and_chloride_7hourly_2007_2009.txt
- NewWaterFractionsPlynlimon_Supplement.docx
- Plynlimon_isotopes_and_chloride_weekly_2004_2009.txt
- DataSetDocumentation.pdf
- hess-23-4367-2019-supplement-title-page.pdf
