# Supplementary material for: New water fractions and transit time distributions at Plynlimon, Wales, estimated from stable water isotopes in precipitation and streamflow
Source: Copernicus journal article supplement (doi:10.5194/hess-23-4367-2019), 2019-10-28
Supplement: Supplementary file 1 [file hess-23-4367-2019-supplement.zip › hess-23-4367-2019-supplement-title-page.pdf]

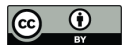

## *Supplement of*

# **New water fractions and transit time distributions at Plynlimon, Wales, estimated from stable water isotopes in precipitation and streamflow**

**Julia L. A. Knapp et al.**

*Correspondence to:* Julia L. A. Knapp ([julia.knapp@usys.ethz.ch](mailto:julia.knapp@usys.ethz.ch))

- [hess-23-4367-2019-supplement-title-page.pdf](#)
- [DataSetDocumentation.pdf](#)
- [NewWaterFractionsPlynlimon\\_Supplement.docx](#)
- [Plynlimon\\_isotopes\\_and\\_chloride\\_7hourly\\_2007\\_2009.txt](#)
- [Plynlimon\\_isotopes\\_and\\_chloride\\_weekly\\_2004\\_2009.txt](#)

The copyright of individual parts of the supplement might differ from the CC BY 4.0 License.
